# Supplementary material for: Generalization of learned responses in the mormyrid electrosensory lobe
Source: eLife journal article supplement (doi:10.7554/elife.44032), 2019-03-12
Supplement: supp [file elife-44032-supp-v2.zip]

Archive with 11 entries (11 files):
- elife_poa_e44032_Figure_4_figure_supplement_2.eps
- elife_poa_e44032_Figure_4_figure_supplement_3.eps
- elife_poa_e44032_Figure_4_figure_supplement_5.eps
- elife_poa_e44032_Figure_4_figure_supplement_1.eps
- elife_poa_e44032_Figure_4_figure_supplement_4.eps
- elife_poa_e44032_Figure_6_figure_supplement_3.tif
- elife_poa_e44032_Figure_6_figure_supplement_1.eps
- elife_poa_e44032_Figure_3_figure_supplement_1.eps
- elife_poa_e44032_Figure_2_figure_supplement_1.eps
- elife_poa_e44032_Transparent_Reporting_File.pdf
- elife_poa_e44032_Figure_6_figure_supplement_2.eps
