# Supplementary figures and images for: Generalization of learned responses in the mormyrid electrosensory lobe
Source: eLife journal article supplement (doi:10.7554/elife.44032), 2019-03-12

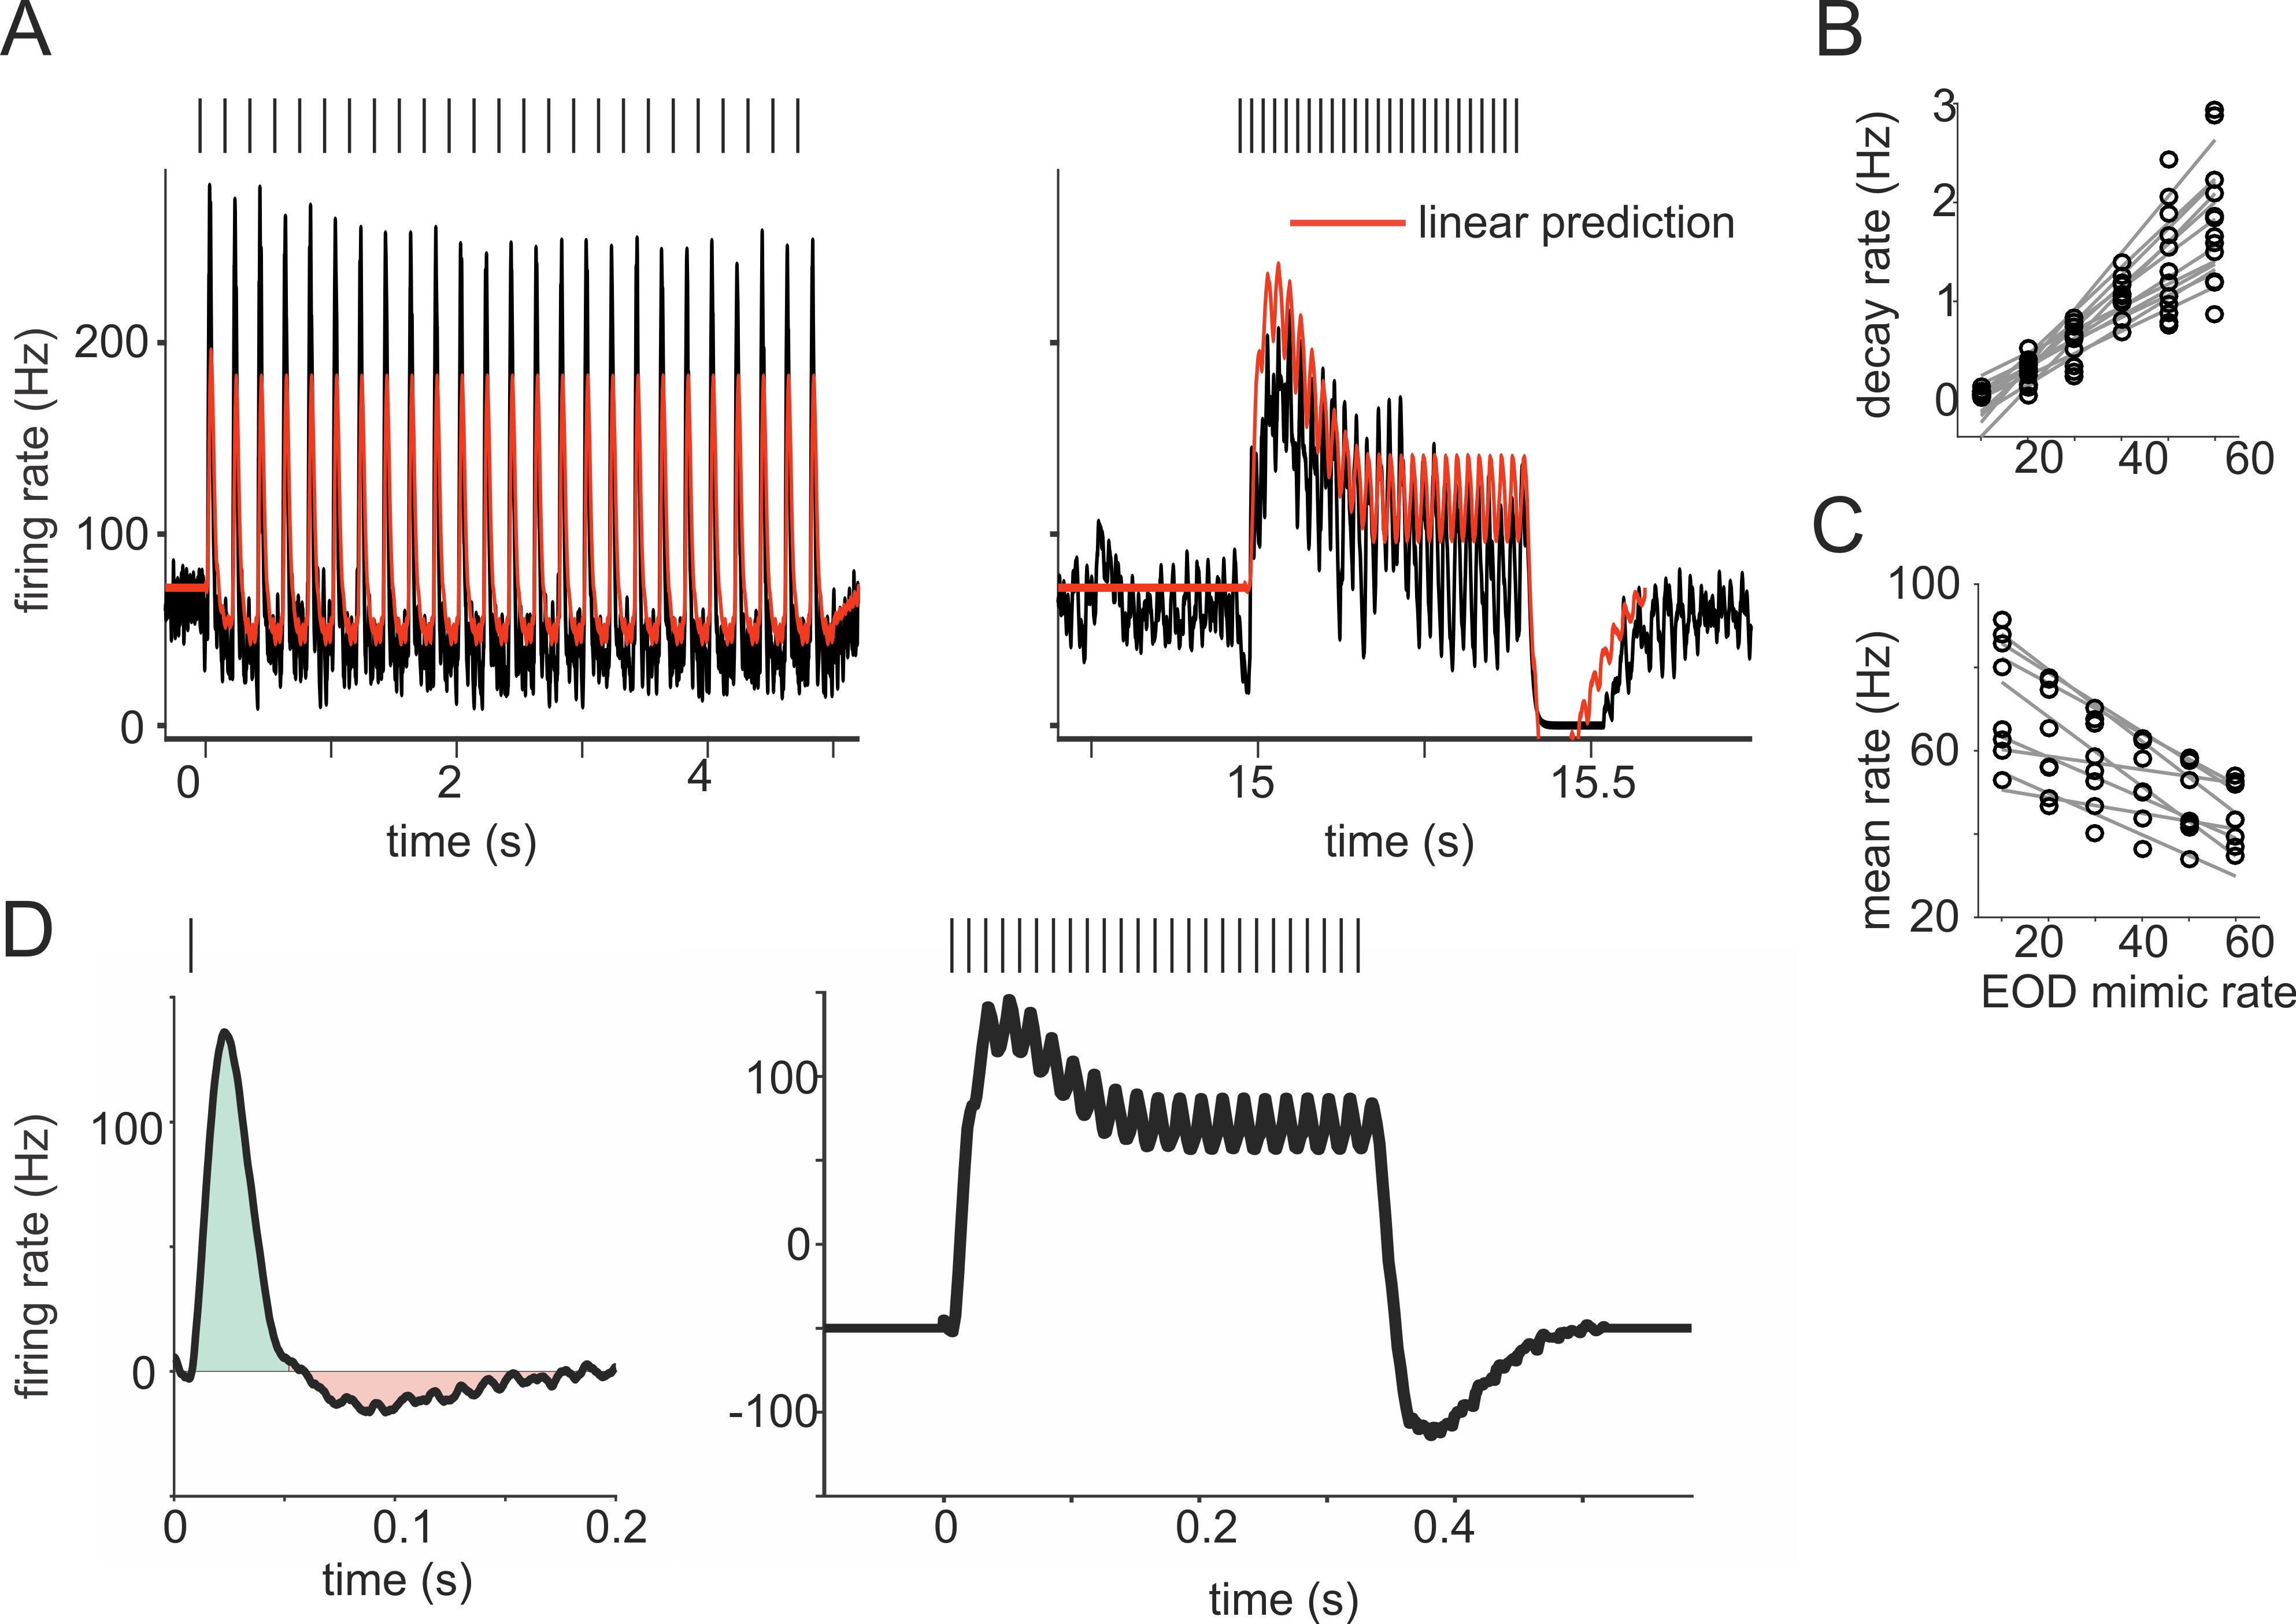

Supplement: supp [file elife-44032-supp-v2.zip › elife_poa_e44032_Figure_6_figure_supplement_3.tif]
